# Supplementary material for: High frequency of additional gene mutations in acute myeloid leukemia with MLL partial tandem duplication: DNMT3A mutation is associated with poor prognosis
Source: PubMed Central journal article supplement (PMC4741760; doi:10.18632/oncotarget.5202), 2015-09-08
Supplement: oncotarget-06-33217-s001.pdf [file oncotarget-06-33217-s001.pdf]

## SUPPLEMENTARY FIGURE AND TABLES

(A)

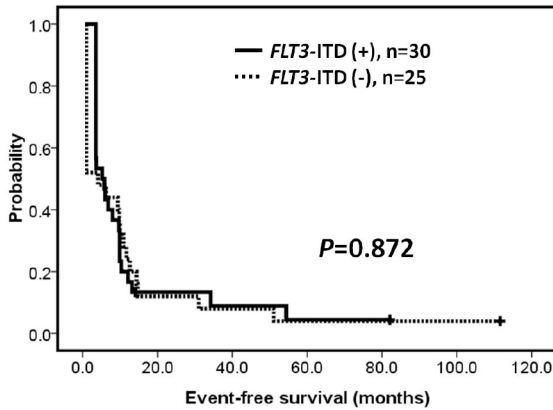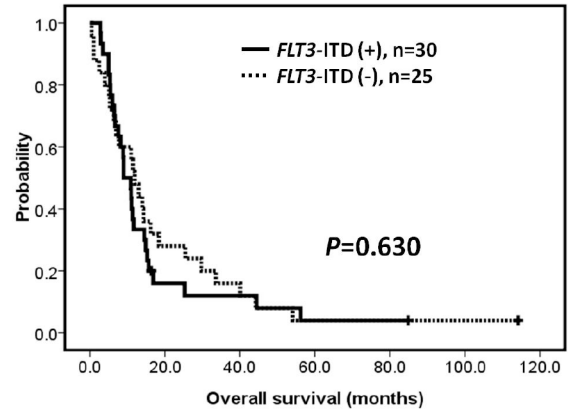

(B)

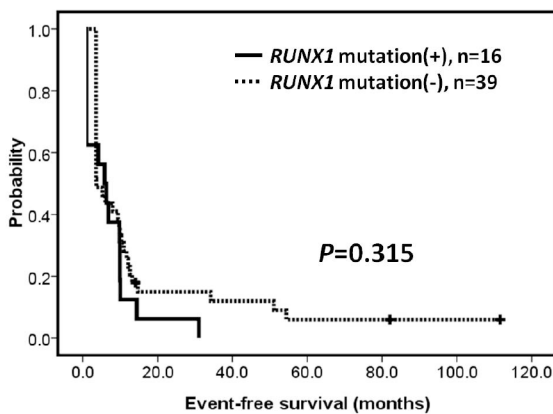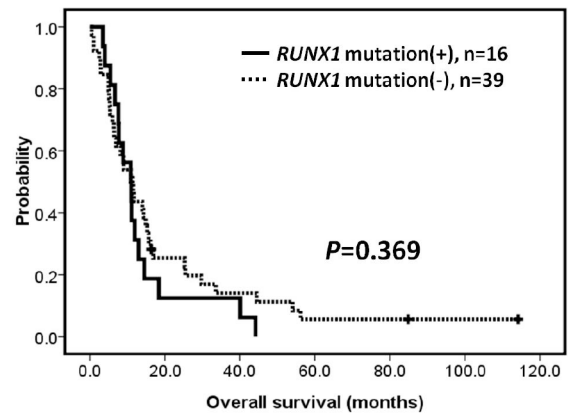

**Supplementary Figure S1: Survivals of patients with *MLL*-PTD AML.** Kaplan-Meier estimate of event-free survival (left panel) and overall survival (right panel) in *MLL*-PTD AML patients according to the mutation status of **A. *FLT3*-ITD**, **B. *RUNX1***. (Continued)

(C)

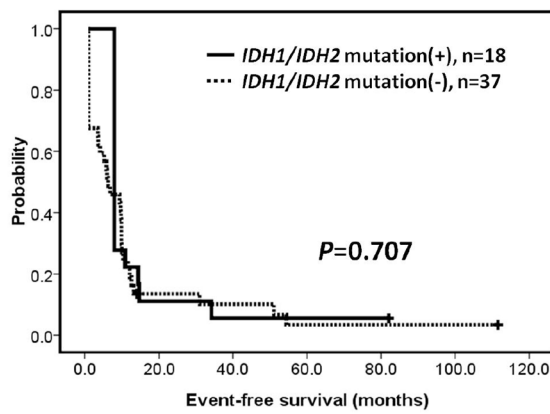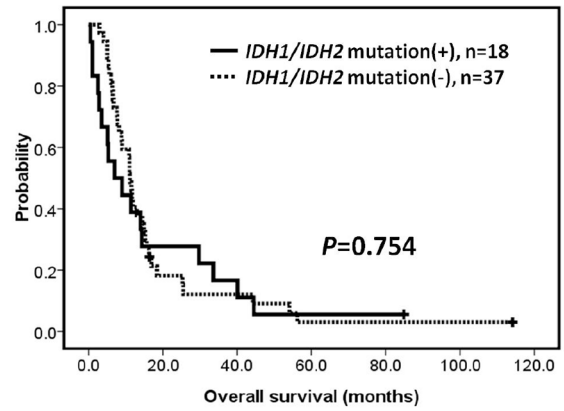

(D)

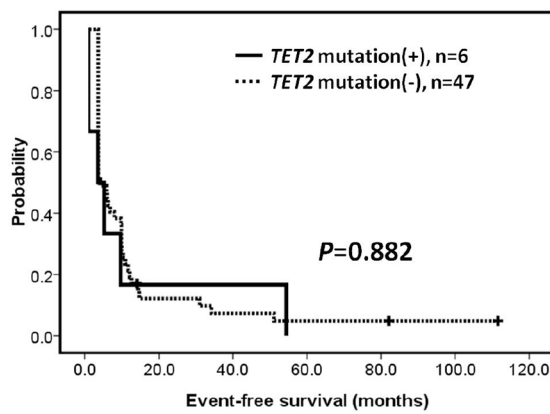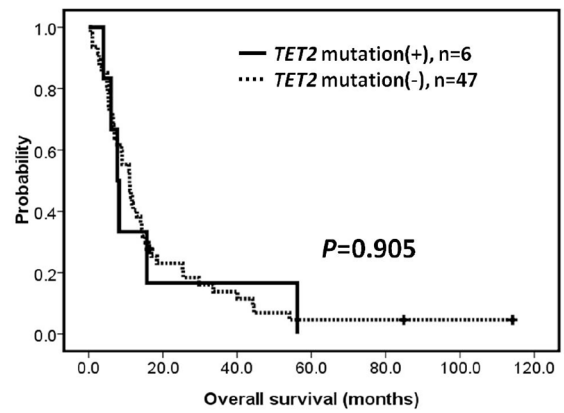

(E)

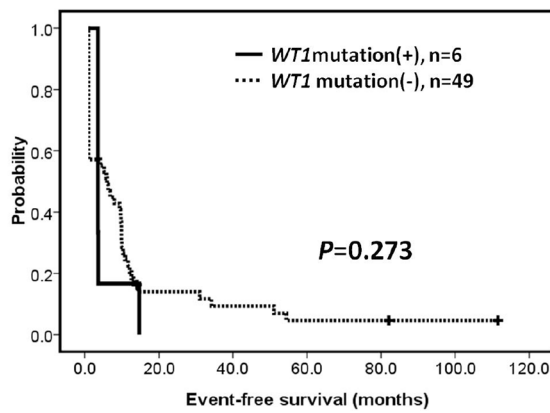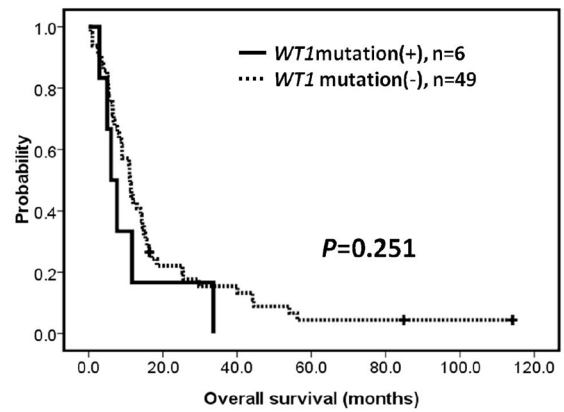

Supplementary Figure S1: (Continued) Survivals of patients with MLL-PTD AML. C. IDH1/IDH2, D. TET2 and E. WT1.

Detection of *MLL*-PTDSupplementary Table S1: Primer sequences for the screen of *MLL*-PTD and *ABL1* genes by RT-PCR

| Size of PCR product           | Primers                  | Primer sequences (5' → 3') |
|-------------------------------|--------------------------|----------------------------|
| <i>MLL</i> -PTD PCR (655 bp)  | MLLe (forward primer)    | CCTGAATCCAAACAGGCCACCACT   |
|                               | MLL3.1c (reverse primer) | AGGAGAGAGTTTACCTGCTC       |
| PCR internal control (201 bp) | ABL-5F (forward primer)  | TTCAGCGGCCAGTAGCATCTGACTT  |
|                               | ABL-3R (reverse primer)  | TGTGATTATAGCCTAAGACCCGGAG  |

*MLL*-PTD (e9e3) PCR product = 654 bp,

*MLL*-PTD (e11e3) PCR product = 900 bp

*ABL1* PCR product = 201 bp

Supplementary Table S2: Primer sequences for the detection of *MLL*-PTD and *ABL1* genes by real-time quantitative RT-PCR TaqMan assay

| Primer/probe          | position (size) | Sequence (5' → 3')              |
|-----------------------|-----------------|---------------------------------|
| <i>MLL</i> -ex9-F     | 4036–4058 (23)  | GTCCAGAGCAGAGCAAACAGAAA         |
| <i>MLL</i> -ex11-F    | 4332–4351 (20)  | TGTGCCAGTAGTGGGCATGT            |
| <i>MLL</i> -ex2(3)-R  | 572–560 (23)    | AATTTTCGGTCAGAGCCACTTCTA        |
| <i>MLL</i> -PTD probe | 494–520 (27)    | CAGAGTGCGAAGTCCCACAAGGTCTCC     |
| <i>ABL</i> -QF        | 589–617(29)     | TGGAGATAACACTCTAAGCATAACTAAAGGT |
| <i>ABL</i> -QR        | 691–712 (21)    | GATGTAGTTGCTTGGGACCCA           |
| <i>ABL</i> probe      | 567–594 (28)    | CCATTTTTGGTTTGGGCTTCACACCATT    |

Positions according to accession numbers D14540 (*MLL*) and M14752 (*ABL1*).

Reference values (NCN = *MLL*-PTD/*ABL1*)

*MLL*-PTD(e9e3) Normal range ( $N = 30$ ): 0.00008~0.0012

*MLL*-PTD(e11e3) Normal range ( $N = 30$ ): 0.00029~0.00073

The normal upper limit of NCN for e9e3 *MLL*-PTD is <0.0012

The normal upper limit of NCN for e11e3 *MLL*-PTD is <0.00073

**Supplementary Table S3: Patient treatment and outcome according to age groups**

| Age groups                                  | <18 years       | 18–59 years    | >=60 years    |
|---------------------------------------------|-----------------|----------------|---------------|
| <b>Treatment</b>                            |                 |                |               |
| Standard 3 + 7 chemotherapy                 | 1               | 41             | 9             |
| TPOG 2002 AML protocol                      | 4               | 0              | 0             |
| Low dose chemotherapy                       | 0               | 0              | 2             |
| Supportive care only                        | 0               | 6              | 35            |
| <b>Complete remission rate</b>              | 100% (5/5)      | 48.8% (20/41)  | 77.8% (7/9)   |
| <b>Allogeneic stem cell transplantation</b> | 1               | 7              | 0             |
| <b>Median OS (months)<sup>+</sup></b>       | 16.9 (5.3–28.5) | 8.2 (3.5–12.8) | 2.8 (0.2–5.4) |
| <b>Median EFS (months)<sup>+</sup></b>      | 10.3 (8.4–12.2) | 0              | 0             |

<sup>+</sup> Values: Median with 95% confidence interval.

**Supplementary Table S4: Clinical characteristics of *MLL*-PTD AML patients with *DNMT3A*, *TET2*, *IDH1/IDH2*, *FLT3*-ITD and *RUNX1* mutations.**
