# Supplementary material for: High frequency of additional gene mutations in acute myeloid leukemia with MLL partial tandem duplication: DNMT3A mutation is associated with poor prognosis
Source: PubMed Central journal article supplement (PMC4741760; doi:10.18632/oncotarget.5202), 2015-09-08
Supplement: oncotarget-06-33217-s002.pdf [file oncotarget-06-33217-s002.pdf]

**Table S4. Clinical characteristics of *MLL*-PTD AML patients with *DNMT3A*, *TET2*, *IDH1/IDH2*, *FLT3-ITD* and *RUNX1* mutations**

| Features                                         | <i>DNMT3A</i> mutation |                 | <i>P</i>     | <i>TET2</i> mutation |                 | <i>P</i> | <i>IDH1/IDH2</i> mutation |                 | <i>P</i> | <i>FLT3-ITD</i> |                 | <i>P</i> | <i>RUNX1</i> mutation |                 | <i>P</i> |
|--------------------------------------------------|------------------------|-----------------|--------------|----------------------|-----------------|----------|---------------------------|-----------------|----------|-----------------|-----------------|----------|-----------------------|-----------------|----------|
|                                                  | Positive               | Negative        |              | Positive             | Negative        |          | Positive                  | Negative        |          | Positive        | Negative        |          | Positive              | Negative        |          |
|                                                  | (N=32)                 | (N=66)          |              | (N=18)               | (N=76)          |          | (N=28)                    | (N=70)          |          | (N=44)          | (N=55)          |          | (N=23)                | (N=76)          |          |
| <b>Median age (years)</b>                        | 61(20-84)              | 54(6-85)        | 0.053        | 71(34-84)            | 54(6-85)        | 0.004    | 54(6-86)                  | 61(9-85)        | 0.351    | 54(9-85)        | 61(6-84)        | 0.246    | 51(6-80)              | 62(11-85)       | 0.202    |
| <b>Male/female</b>                               | 12/20                  | 37/29           | <b>0.085</b> | 10/8                 | 37/39           | 0.600    | 15/13                     | 34/36           | 0.412    | 18/26           | 31/23           | 0.104    | 10/13                 | 39/36           | 0.475    |
| <b>Median Hemoglobin level (g/dl)</b>            | 7.8 (3.3-13.7)         | 7.2(3.6-11.6)   | 0.611        | 7.2(3.3-13.7)        | 7.4(3.6-13.7)   | 0.829    | 7.7(5.2-11.4)             | 7.2(3.3-13.7)   | 0.037    | 7.2(3.3-13.7)   | 7.7(3.8-11.4)   | 0.165    | 7.1(3.8-11.6)         | 7.5(3.3-13.7)   | 0.234    |
| <b>Median platelet count (x10<sup>9</sup>/l)</b> | 41.0(3-900)            | 52.0(1-471)     | 0.705        | 48.0(12-303)         | 46.0(1-900)     | 0.686    | 31.0(3-900)               | 46.5(1-327)     | 0.662    | 49.5(1-327)     | 45.0(3-900)     | 0.645    | 48.0(1-327)           | 45.5(3-900)     | 0.873    |
| <b>Median WBC count (x10<sup>9</sup>/l)</b>      | 45.4(1.6-451.4)        | 23.0(0.8-205.2) | 0.135        | 51.8(5.1-255.0)      | 27.3(0.8-451.4) | 0.136    | 11.3(0.8-451.4)           | 41.5(1-353.9)   | 0.059    | 63.5(1-451.4)   | 14.9(0.8-187.2) | 0.001    | 59.2(1-203.7)         | 28.9(0.8-451.4) | 0.123    |
| <b>Median circulating blast (%)</b>              | 63.5(4.7-96.5)         | 64.0(0-98.3)    | 0.611        | 64.6(6.5-95.8)       | 62.9(0-98.3)    | 0.676    | 73.6(0-98.3)              | 63.3(0-95.8)    | 0.712    | 71.8(0-98.3)    | 61.7(0-94.0)    | 0.036    | 65.6(0-94.0)          | 60.1(0-98.3)    | 0.465    |
| <b>Median marrow blast (%)</b>                   | 82.1(36.4-99.4)        | 77.8(2.5-97.0)  | 0.256        | 77.8(45.2-99.4)      | 80.3(2.5-98.8)  | 0.851    | 77.8(42.7-96.2)           | 80.5(34.7-99.4) | 0.096    | 82.9(2.5-99.4)  | 69.3(34.7-98.8) | 0.001    | 85.3(36.4-99.3)       | 77.8(2.5-99.4)  | 0.130    |
| <b>ELN cytogenetic risk group</b>                |                        |                 | 0.547        |                      |                 | 0.307    |                           |                 | 0.496    |                 |                 | 1.000    |                       |                 | 1.000    |
| <b>Intermediate 1</b>                            | 21                     | 35              |              | 8                    | 46              |          | 18                        | 36              |          | 28              | 28              |          | 14                    | 42              |          |
| <b>Intermediate 2</b>                            | 6                      | 13              |              | 5                    | 14              |          | 3                         | 16              |          | 10              | 9               |          | 5                     | 14              |          |
| <b>Adverse</b>                                   | 0                      | 1               |              | 0                    | 1               |          | 0                         | 1               |          | 0               | 1               |          | 0                     | 1               |          |
| <b>FAB classification</b>                        |                        |                 |              |                      |                 | 0.873    |                           |                 | 0.496    |                 |                 | 0.144    |                       |                 | 0.313    |
| <b>M0/M1/M2</b>                                  | 0/10/14                | 5/14/29         |              | 0/5/8                | 5/18/32         |          | 3/7/14                    | 2/17/29         |          | 1/15/16         | 4/9/27          |          | 2/7/8                 | 3/17/35         |          |
| <b>M4/M5</b>                                     | 5/2                    | 12/3            |              | 4/1                  | 13/4            |          | 2/0                       | 15/5            |          | 9/3             | 8/2             |          | 3/3                   | 14/2            |          |
| <b>M6/M7</b>                                     | 0/1                    | 3/0             |              | 0/0                  | 3/1             |          | 1/1                       | 2/0             |          | 0/0             | 3/1             |          | 0/0                   | 3/1             |          |
